# Supplementary material for: In Vivo Validation of Predicted and Conserved T Cell Epitopes in a Swine Influenza Model
Source: PubMed Central journal article supplement (PMC4943726; doi:10.1371/journal.pone.0159237), 2016-07-13
Supplement: pone.0159237.s001.pdf [file pone.0159237.s001.pdf]

**S1 Table. GenBank identification numbers of gene sequences of proteins expressed by representative swine IAV**

| Strain                                 | GenBank id |             |           |           |           |           |           |           |
|----------------------------------------|------------|-------------|-----------|-----------|-----------|-----------|-----------|-----------|
|                                        | PB2        | PB1, PB1-F2 | PA        | HA        | NP        | NA        | M2, M1    | NS2, NS1  |
| A/California/04/2009(H1N1)             | 227809823  | 332384205   | 227977113 | 229535948 | 332384201 | 332384199 | 332384196 | 332384209 |
| A/swine/Illinois/5265/2010(H1N1)       |            |             |           | 290873719 |           | 290873721 | 290873723 |           |
| A/swine/Ohio/511445/2007(H1N1)         | 197344175  | 197344177   | 197344180 | 197344171 | 197344182 | 197344173 | 197344184 | 197344187 |
| A/swine/Minnesota/02011/2008(H1N2)     | 304272397  | 304272373   | 304272351 | 304272327 | 304272303 | 304272279 | 304272249 | 304272213 |
| A/swine/Minnesota/A01301731/2012(H1N2) | 421920014  | 421920016   | 421920018 | 421920020 | 421920022 | 421920024 | 421920026 | 421920029 |
| A/swine/Texas/4199-2/1998(H3N2)        | 340784749  | 340784753   | 340784756 | 340784760 | 340784762 | 340784766 | 340784768 | 340784771 |
| A/turkey/Ohio/313053/2004(H3N2)        | 361630452  | 367462658   | 367462657 | 371574609 | 367462656 | 370321100 | 361630450 | 361630451 |
