# Supplementary material for: In Vivo Validation of Predicted and Conserved T Cell Epitopes in a Swine Influenza Model
Source: PubMed Central journal article supplement (PMC4943726; doi:10.1371/journal.pone.0159237), 2016-07-13
Supplement: pone.0159237.s002.pdf [file pone.0159237.s002.pdf]

**S2 Table. Low-resolution SLA-typing results**

| Group         | Pig | SLA class I    |              |           | SLA class II    |              |           |
|---------------|-----|----------------|--------------|-----------|-----------------|--------------|-----------|
|               |     | SLA-1          | SLA-2        | SLA-3     | DRB1            | DQB1         | DQA       |
| NV            | 413 | 08XX           | 0901-02      | 05XX,0602 | 07XX,10XX       | 0201,06XX    | 01XX,02XX |
|               | 414 | 08XX,15XX      | 12XX,16XX    | 0601,07XX | 0401-02,0403-04 | 0202,0302-03 | 02XX      |
| Sham          | 419 | 08XX,15XX      | 05XX,16XX    | 07XX      | 0403-04,10XX    | 06XX,07XX    | 01XX      |
|               | 420 | 08XX           | 0901-02,12XX | 05XX,0601 | 0401-02,07XX    | 0201,0202    | 02XX      |
|               | 421 | 08XX,12XX,1301 | 05XX,10XX    | 05XX,07XX | 06XX,10XX       | 06XX,07XX    | 01XX      |
|               | 422 | 08XX,15XX      | 12XX,16XX    | 0601,07XX | 0401-02,0403-04 | 0202,0302-03 | 02XX      |
|               | 423 | 08XX           | 0901-02,12XX | 05XX,0601 | 0401-02,07XX    | 0201,0202    | 02XX      |
|               | 424 | 08XX           | 12XX         | 0601      | 0401-02         | 0202         | 02XX      |
|               | 425 | 12XX,1301      | 10XX         | 05XX      | 06XX,10XX       | 06XX,07XX    | 01XX      |
|               | 426 | 08XX           | 05XX,12XX    | 0601,07XX | 0401-02,10XX    | 0202,06XX    | 01XX,02XX |
|               | 428 | 08XX           | 05XX,12XX    | 0601,07XX | 0401-02,10XX    | 0202,06XX    | 01XX,02XX |
| PigMatrix-EDV | 429 | 08XX,12XX,1301 | 0901-02,12XX | 05XX,0602 | 06XX,10XX       | 06XX,07XX    | 01XX      |
|               | 430 | 08XX           | 05XX,12XX    | 0601,07XX | 0401-02,10XX    | 0202,06XX    | 01XX,02XX |
|               | 431 | 08XX,12XX,1301 | 05XX,10XX    | 05XX,07XX | 06XX,10XX       | 06XX,07XX    | 01XX      |
|               | 432 | 08XX           | 05XX,10XX    | 05XX,07XX | 10XX            | 06XX         | 01XX      |
|               | 433 | 08XX,12XX,1301 | 0901-02,12XX | 05XX,0602 | 06XX,10XX       | 06XX,07XX    | 01XX      |
|               | 434 | 04XX,08XX      | 04XX,12XX    | 04XX,0601 | 0401-02,09XX    | 0202,08XX    | 02XX,03XX |
|               | 435 | 1103,12XX,1301 | 10XX,jh02    | 05XX      | 06XX            | 07XX         | 01XX      |
| FluSure       | 436 | 08XX           | 05XX,12XX    | 05XX,0601 | 0401-02,10XX    | 0202,06XX    | 01XX,02XX |
|               | 437 | 12XX,1301      | 10XX         | 05XX      | 06XX            | 07XX         | 01XX      |
|               | 438 | 08XX,12XX,1301 | 05XX,12XX    | 05XX,0601 | 0401-02,06XX    | 0202,07XX    | 01XX,02XX |
|               | 439 | 08XX           | 12XX         | 0601      | 0401-02         | 0202         | 02XX      |
|               | 440 | 07XX,08XX      | 02XX,05XX    | 04XX,07XX | 02XX,10XX       | 0201,06XX    | 01XX,02XX |
|               | 441 | 1103,12XX,1301 | 10XX,jh02    | 05XX      | 06XX            | 07XX         | 01XX      |
