# Supplementary material for: In Vivo Validation of Predicted and Conserved T Cell Epitopes in a Swine Influenza Model
Source: PubMed Central journal article supplement (PMC4943726; doi:10.1371/journal.pone.0159237), 2016-07-13
Supplement: pone.0159237.s003.pdf [file pone.0159237.s003.pdf]

## S1 Text. Concatemer construct sequences

>Class I concatemer construct

```
cggatctaccagattctggccatctacatcaccatcggcaagtgccccaagtactctctgc
tgaccgaagtggaaacatatggccccggaccggcaccagtgccgatcagcagctctctgta
cggacccggaccggggagatgaacgccccaaactatcactatctggccagctgcatggga
ctgatctacgacaccgtgaaccggaccaccagtacggcaccgagaagctgaccatcacat
acgccttcgacgagcggcggaaacaatacgataccgtgcacgaccggacccccctatctgac
tgaagtggaaacttacgtgctgggaccggaccggcagcgtgaagaatggcacatacgac
tacggcaccatcaaggacagaagccccataacgcccacacactgtgcatcggctatgggc
ccggacccgggggaatggtggatgggtggtagcggctactgcaccgagctgaagctgagcga
ctatggaccggaccggcgtgtcagatggcggcccaaatctgtacgaaatctgccccaaag
ctggccgagtagaagagctgcatcaaccgggtgcttctaccaagtgtcccggccccatgtttc
tgtacggcgccaagaagtggctctgagctacggaccggaccggcgaactggatgcccc
aaactaccactacgatctgctggaaaatctgcaagcctacgccagccaaggcaccaagcgg
agctacaacaccgatctggaagctctgatggaaaacatggacaaggccgtgaagctgatac
tgagcaccgccagcagctggtcttacggaccggaccggcggaatgatcgacgggtggtg
tgataactgatga
```

>Class II concatemer construct

```
acaagaggcgtgcagatcgccagcaacgagaacgtggaaaccatggacagcaacacactgg
aactgcggacatacgtgctgagcatcatccccagcggccctctgaaggccgagatcgccca
gagactggaaagcgtgtacagatacggcttcgtggccaacttcagcatggaaactgcccagc
ttcggcgtgtccggctgcagaacattctttctgacacaaggcgtctctgctgaacgacaagc
acatcgacccttcaagctgctgcagaatagccaagtgggtgtctctgatgcggccctacga
ggaactgcgcgagcagctgtccagcgtgtccagcttcgagcggttccaagacattctgatg
cgcatgagcaagatgcagctgggctccagcagcagatgatgggcatgttcaatatgctga
gcaccgtgctgggcgtgtccatcggcgacaagatcacattcgaggccaccggcaatctggt
ggtgccccggtacagatccaagtttctgctgatggacgctctgaagctgtccatcgaggac
cctagctgcatgggactgatctacaaccggatgggcaccgtgaccaccgaggccgcttttg
gactcgtgtgcttcgagcagatcactttcatgcaagctctgcagctgctgctggaagtgga
aaaccagacttacgtgaacatcagcaacaccaacttcgccgctggccagagcgtggtgtcc
gtgaagctggtgcccagatacgcctttgccatggaacggaatgccggcagcggcatcatca
tcagcgaagtgcacatctactatctggaaaaggccaacaagatcaagagcagaaaaacca
catccacatctttggccccggaccggcatggccaatctgattctgcagatcggcaacatc
atctccatctggatcagccactctatcgaggatctgatctttctggctcggagcgcactga
ttctgagagggcagcgtggccccacaagagctgtctgccaccagacagatggtgcacgccat
gagaaccatcggcaccaccctagctctagcgcctccgtgggtgtctgtgaaactggccggc
aatagctctctgtgccccgtgtccaccggatctaccagattctggccatctacagcaccg
tgccctcttctctggtgctcgtgtgatga
```
